# Supplementary material
Source: publisher figshare collection journal article supplement (https://aacr.figshare.com/articles/dataset/_/22930509)

# Figure S2

**A**

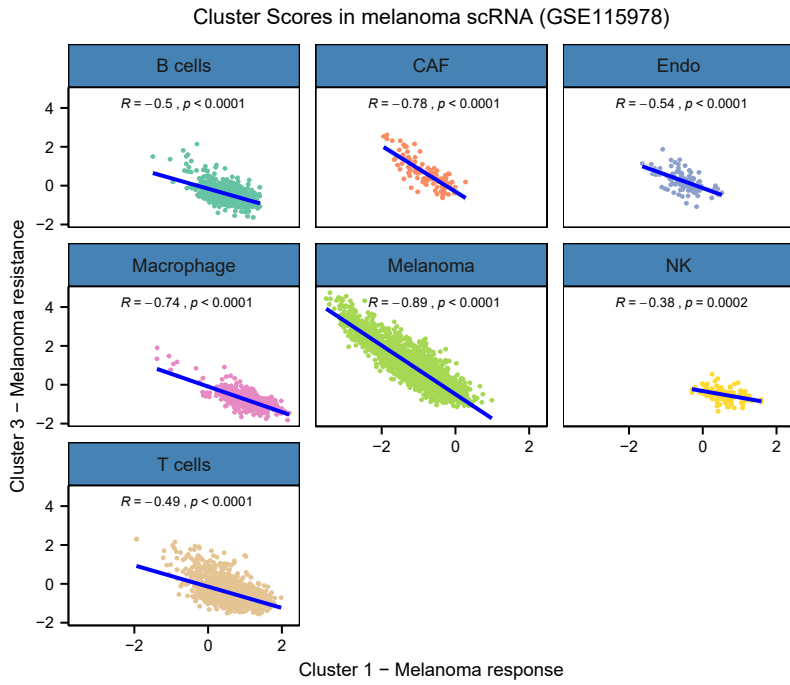

**B**

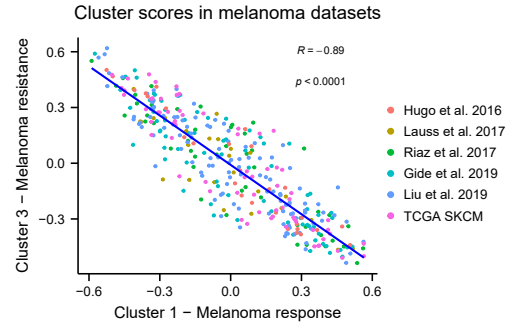

**C**

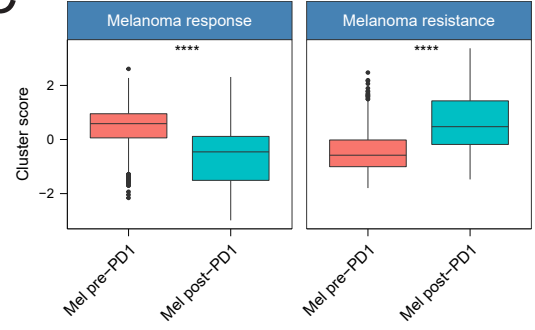

**D**

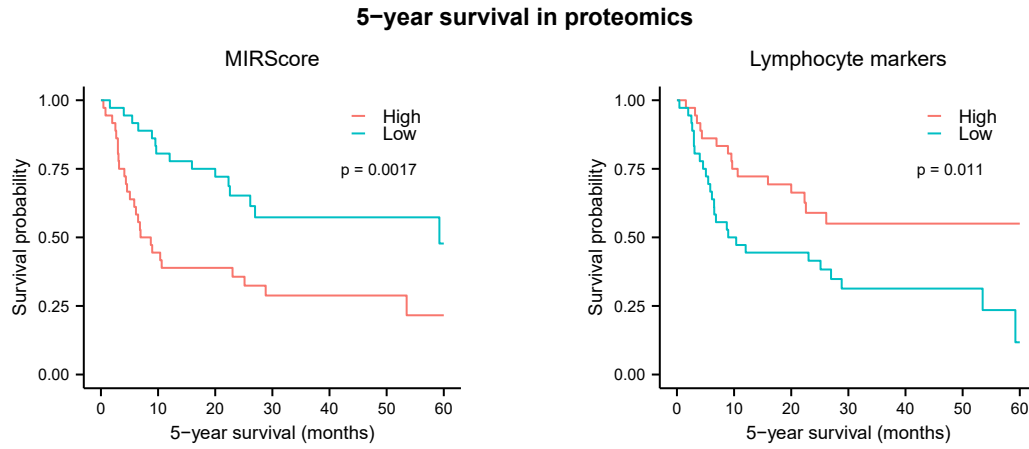

**E**

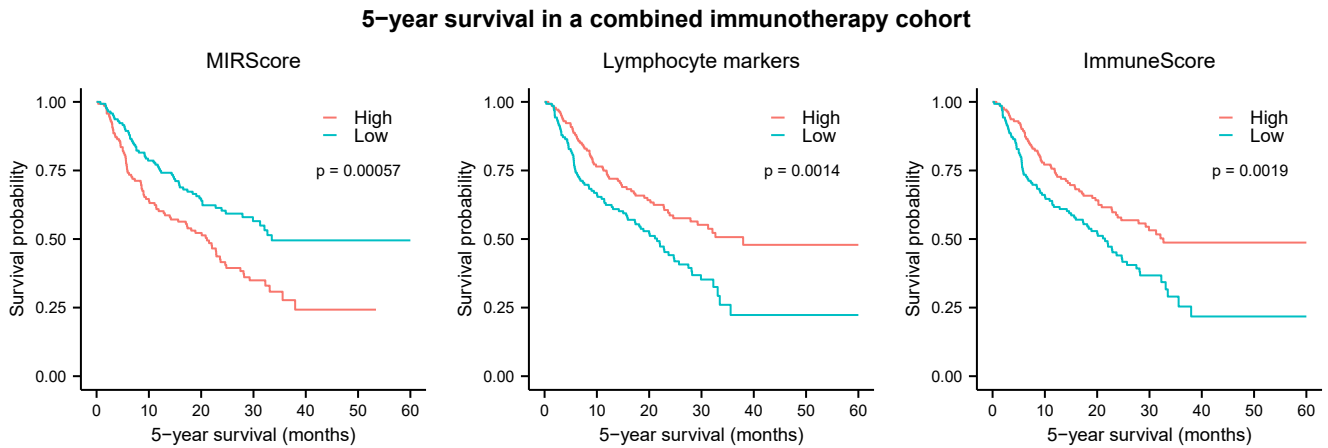

Supplement: Supplementary file 1 [file 40665096]
